# Supplementary material for: Unraveling the Relevance of ARL GTPases in Cutaneous Melanoma Prognosis through Integrated Bioinformatics Analysis
Source: MDPI journal article supplement (doi:10.3390/ijms22179260), 2021-08-26
Supplement: s1 [file s1]

**Table S1.** Demographics and characteristics of patients with CM downloaded from TCGA.

| Patient Characteristics         | Classification | Number of Patients Primary CM<br>(n=102) | Number of Patients Metastatic CM<br>(n=366) |
|---------------------------------|----------------|------------------------------------------|---------------------------------------------|
| <b>Gender</b>                   | Male           | 60 (58.8 %)                              | 228 (62.3%)                                 |
|                                 | Female         | 42 (41.2 %)                              | 138 (37.7%)                                 |
| <b>Age at diagnosis (years)</b> | Median         | 65                                       | 56                                          |
| <b>Tumor Stage</b>              | Stage I        | 2 (2%)                                   | 74 (20.2%)                                  |
|                                 | Stage II       | 66 (64.7%)                               | 73 (20.0%)                                  |
|                                 | Stage III      | 26 (25.5%)                               | 144 (39.3%)                                 |
|                                 | Stage IV       | 3 (2.9%)                                 | 21 (5.7%)                                   |
|                                 | Not reported   | 5 (4.9%)                                 | 54 (14.8%)                                  |
| <b>BRAF mutations</b>           | Detected       | 43 (42.2%)                               | 142 (38.8%)                                 |
|                                 | Not detected   | 59 (57.8%)                               | 224 (61.2%)                                 |
| <b>NRAS mutations</b>           | Detected       | 10 (9.8%)                                | 88 (24%)                                    |
|                                 | Not detected   | 92 (90.2%)                               | 278 (76%)                                   |
| <b>NF1 mutations</b>            | Detected       | 9 (8.8%)                                 | 37 (10.1%)                                  |
|                                 | Not detected   | 93 (91.2%)                               | 329 (89.9%)                                 |

**Table S2.** Multivariable analysis of *ARL1* expression for overall survival of TCGA melanoma patients

|                       | Classification<br>(n) | Mean<br>OS<br>(years) | Standard<br>Error | p-value | Exp(B) | 95,0% CI for Exp(B) |       |
|-----------------------|-----------------------|-----------------------|-------------------|---------|--------|---------------------|-------|
|                       |                       |                       |                   |         |        | Lower               | Upper |
| <b>Age</b>            | Mean=59               |                       | 0,005             | 0,000   | 1,021  | 1,010               | 1,031 |
| <b>Gender</b>         | Male (254)            |                       | 0,159             | 0,570   | 1,094  | 0,802               | 1,494 |
|                       | Female (155)          |                       |                   |         |        |                     |       |
| <b>Tumor Stage</b>    | Stage I (79)          |                       | 0,359             | 0,000   | 0,258  | 0,128               | 0,522 |
|                       | Stage II (142)        |                       |                   |         |        |                     |       |
|                       | Stage III (165)       |                       |                   |         |        |                     |       |
|                       | Stage IV (23)         |                       |                   |         |        |                     |       |
| <b>Type of tumor</b>  | Primary (97)          |                       | 0,248             | 0,002   | 2,143  | 1,317               | 3,487 |
|                       | Metastatic (312)      |                       |                   |         |        |                     |       |
| <b>BRAF mutations</b> | Mutated (161)         |                       | 0,173             | 0,990   | 1,002  | 0,714               | 1,406 |
|                       | Wildtype (248)        |                       |                   |         |        |                     |       |
| <b>NRAS mutations</b> | Mutated (87)          |                       | 0,184             | 0,411   | 0,860  | 0,599               | 1,233 |
|                       | Wildtype (322)        |                       |                   |         |        |                     |       |
| <b>NF1 mutations</b>  | Mutated (40)          |                       | 0,249             | 0,603   | 1,139  | 0,699               | 1,855 |
|                       | Wildtype (369)        |                       |                   |         |        |                     |       |
| <b>ARL1</b>           |                       |                       | 0,204             | 0,011   | 1,676  | 1,124               | 2,500 |
|                       | Low expression (72)   | 4,8                   | 0,598             |         |        |                     |       |
|                       | High expression (337) | 11,1                  | 0,738             |         |        |                     |       |

**Table S3.** Multivariable analysis of *ARL3* expression for overall survival of TCGA CM patients.

|                                  | Classification<br>(n) | Mean<br>OS<br>(years) | Standard<br>Error | p-value | Exp(B) | 95,0% CI for Exp(B) |       |
|----------------------------------|-----------------------|-----------------------|-------------------|---------|--------|---------------------|-------|
|                                  |                       |                       |                   |         |        | Lower               | Upper |
| <b>Age</b>                       | Mean=59               |                       | 0,005             | 0,000   | 1,021  | 1,011               | 1,032 |
| <b>Gender</b>                    | Male (254)            |                       | 0,159             | 0,457   | 1,126  | 0,824               | 1,537 |
|                                  | Female (155)          |                       |                   |         |        |                     |       |
| <b>Tumor<br/>Stage</b>           | Stage I (79)          |                       | 0,357             | 0,000   | 0,267  | 0,132               | 0,537 |
|                                  | Stage II (142)        |                       |                   |         |        |                     |       |
|                                  | Stage III (165)       |                       |                   |         |        |                     |       |
|                                  | Stage IV (23)         |                       |                   |         |        |                     |       |
| <b>Type of<br/>tumor</b>         | Primary (97)          |                       | 0,245             | 0,001   | 2,334  | 1,445               | 3,760 |
|                                  | Metastatic (312)      |                       |                   |         |        |                     |       |
| <b><i>BRAF</i><br/>mutations</b> | Mutated (161)         |                       | 0,172             | 0,709   | 1,066  | 0,761               | 1,495 |
|                                  | Wildtype (248)        |                       |                   |         |        |                     |       |
| <b><i>NRAS</i><br/>mutations</b> | Mutated (87)          |                       | 0,184             | 0,471   | 0,876  | 0,611               | 1,256 |
|                                  | Wildtype (322)        |                       |                   |         |        |                     |       |
| <b><i>NF1</i><br/>mutations</b>  | Mutated (40)          |                       | 0,248             | 0,388   | 1,239  | 0,761               | 2,016 |
|                                  | Wildtype (369)        |                       |                   |         |        |                     |       |
| <b><i>ARL3</i></b>               |                       |                       | 0,171             | 0,030   | 0,690  | 0,493               | 0,965 |
|                                  | Low expression (96)   | 11,1                  |                   |         |        |                     |       |
|                                  | High expression (313) | 7,3                   |                   |         |        |                     |       |

**Table S4.** Multivariable analysis of *ARL5B* expression for overall survival of TCGA melanoma patients.

|                           | Classification<br>(n) | Mean<br>OS<br>(years) | Standard<br>Error | p-value | Exp(B) | 95,0% CI for Exp(B) |       |
|---------------------------|-----------------------|-----------------------|-------------------|---------|--------|---------------------|-------|
|                           |                       |                       |                   |         |        | Lower               | Upper |
| <b>Age</b>                | Mean=59               |                       | 0,005             | 0,000   | 1,020  | 1,010               | 1,031 |
| <b>Gender</b>             | Male (254)            |                       | 0,159             | 0,512   | 1,109  | 0,813               | 1,513 |
|                           | Female (155)          |                       |                   |         |        |                     |       |
| <b>Tumor<br/>Stage</b>    | Stage I (79)          |                       | 0,357             | 0,000   | 0,264  | 0,131               | 0,532 |
|                           | Stage II (142)        |                       |                   |         |        |                     |       |
|                           | Stage III (165)       |                       |                   |         |        |                     |       |
|                           | Stage IV (23)         |                       |                   |         |        |                     |       |
| <b>Type of<br/>tumor</b>  | Primary (97)          |                       | 0,245             | 0,020   | 2,160  | 1,126               | 4,140 |
|                           | Metastatic (312)      |                       |                   |         |        |                     |       |
| <b>BRAF<br/>mutations</b> | Mutated (161)         |                       | 0,172             | 0,635   | 1,085  | 0,774               | 1,521 |
|                           | Wildtype (248)        |                       |                   |         |        |                     |       |
| <b>NRAS<br/>mutations</b> | Mutated (87)          |                       | 0,184             | 0,534   | 0,892  | 0,621               | 1,280 |
|                           | Wildtype (322)        |                       |                   |         |        |                     |       |
| <b>NF1<br/>mutations</b>  | Mutated (40)          |                       | 0,248             | 0,454   | 1,204  | 0,741               | 1,957 |
|                           | Wildtype (369)        |                       |                   |         |        |                     |       |
| <b>ARL5B</b>              |                       |                       | 0,171             | 0,598   | 1,143  | 0,695               | 1,880 |
|                           | Low expression (288)  | 10,8                  |                   |         |        |                     |       |
|                           | High expression (121) | 8,2                   |                   |         |        |                     |       |

**Table S5.** Multivariable analysis of *ARL8A* expression for overall survival of TCGA CM patients.

|                       | Classification (n)    | Mean OS (years) | Standard Error | p-value | Exp(B) | 95,0% CI for Exp(B) |       |
|-----------------------|-----------------------|-----------------|----------------|---------|--------|---------------------|-------|
|                       |                       |                 |                |         |        | Lower               | Upper |
| <b>Age</b>            | Mean=59               |                 | 0,005          | 0,000   | 1,021  | 1,011               | 1,031 |
| <b>Gender</b>         | Male (254)            |                 | 0,159          | 0,486   | 1,117  | 0,819               | 1,524 |
|                       | Female (155)          |                 |                |         |        |                     |       |
| <b>Tumor Stage</b>    | Stage I (79)          |                 | 0,358          | 0,000   | 0,266  | 0,132               | 0,535 |
|                       | Stage II (142)        |                 |                |         |        |                     |       |
|                       | Stage III (165)       |                 |                |         |        |                     |       |
|                       | Stage IV (23)         |                 |                |         |        |                     |       |
| <b>Type of tumor</b>  | Primary (97)          |                 | 0,322          | 0,048   | 1,889  | 1,006               | 3,548 |
|                       | Metastatic (312)      |                 |                |         |        |                     |       |
| <b>BRAF mutations</b> | Mutated (161)         |                 | 0,170          | 0,678   | 1,073  | 0,769               | 1,499 |
|                       | Wildtype (248)        |                 |                |         |        |                     |       |
| <b>NRAS mutations</b> | Mutated (87)          |                 | 0,185          | 0,441   | 0,867  | 0,604               | 1,246 |
|                       | Wildtype (322)        |                 |                |         |        |                     |       |
| <b>NF1 mutations</b>  | Mutated (40)          |                 | 0,250          | 0,372   | 1,250  | 0,766               | 2,041 |
|                       | Wildtype (369)        |                 |                |         |        |                     |       |
| <b>ARL8A</b>          |                       |                 | 0,331          | 0,192   | 0,649  | 0,340               | 1,242 |
|                       | Low expression (65)   | 4,0             |                |         |        |                     |       |
|                       | High expression (344) | 10,6            |                |         |        |                     |       |

**Table S6.** Multivariable analysis of *ARL10* expression for overall survival of TCGA CM patients.

|                           | Classification<br>(n) | Mean<br>OS<br>(years) | Standard<br>Error | p-value | Exp(B) | 95,0% CI for Exp(B) |       |
|---------------------------|-----------------------|-----------------------|-------------------|---------|--------|---------------------|-------|
|                           |                       |                       |                   |         |        | Lower               | Upper |
| <b>Age</b>                | Mean=59               |                       | 0,005             | 0,000   | 1,021  | 1,011               | 1,032 |
| <b>Gender</b>             | Male (254)            |                       | 0,159             | 0,548   | 1,100  | 0,806               | 1,501 |
|                           | Female (155)          |                       |                   |         |        |                     |       |
| <b>Tumor<br/>Stage</b>    | Stage I (79)          |                       | 0,357             | 0,000   | 0,271  | 0,135               | 0,547 |
|                           | Stage II (142)        |                       |                   |         |        |                     |       |
|                           | Stage III (165)       |                       |                   |         |        |                     |       |
|                           | Stage IV (23)         |                       |                   |         |        |                     |       |
| <b>Type of<br/>tumor</b>  | Primary (97)          |                       | 0,276             | 0,023   | 1,875  | 1,091               | 3,221 |
|                           | Metastatic (312)      |                       |                   |         |        |                     |       |
| <b>BRAF<br/>mutations</b> | Mutated (161)         |                       | 0,172             | 0,722   | 1,063  | 0,759               | 1,490 |
|                           | Wildtype (248)        |                       |                   |         |        |                     |       |
| <b>NRAS<br/>mutations</b> | Mutated (87)          |                       | 0,184             | 0,490   | 0,881  | 0,615               | 1,262 |
|                           | Wildtype (322)        |                       |                   |         |        |                     |       |
| <b>NF1<br/>mutations</b>  | Mutated (40)          |                       | 0,249             | 0,391   | 1,238  | 0,760               | 2,015 |
|                           | Wildtype (369)        |                       |                   |         |        |                     |       |
| <b>ARL10</b>              |                       |                       | 0,190             | 0,050   | 1,452  | 1,283               | 2,413 |
|                           | Low expression (263)  | 11,4                  |                   |         |        |                     |       |
|                           | High expression (146) | 6,7                   |                   |         |        |                     |       |

**Table S7.** Multivariable analysis of *ARL11* expression for overall survival of TCGA melanoma patients.

|                           | Classification<br>(n) | Mean<br>OS<br>(years) | Standard<br>Error | p-value | Exp(B) | 95,0% CI for Exp(B) |        |
|---------------------------|-----------------------|-----------------------|-------------------|---------|--------|---------------------|--------|
|                           |                       |                       |                   |         |        | Lower               | Upper  |
| <b>Age</b>                | Mean=59               |                       | 0,005             | 0,000   | 1,020  | 1,010               | 1,031  |
| <b>Gender</b>             | Male (254)            |                       | 0,159             | 0,519   | 1,108  | 0,811               | 1,513  |
|                           | Female (155)          |                       |                   |         |        |                     |        |
| <b>Tumor<br/>Stage</b>    | Stage I (79)          |                       | 0,358             | 0,000   | 0,267  | 0,132               | 0,538  |
|                           | Stage II (142)        |                       |                   |         |        |                     |        |
|                           | Stage III (165)       |                       |                   |         |        |                     |        |
|                           | Stage IV (23)         |                       |                   |         |        |                     |        |
| <b>Type of<br/>tumor</b>  | Primary (97)          |                       | 1,020             | 0,427   | 2,248  | 0,304               | 16,603 |
|                           | Metastatic (312)      |                       |                   |         |        |                     |        |
| <b>BRAF<br/>mutations</b> | Mutated (161)         |                       | 0,171             | 0,677   | 1,074  | 0,768               | 1,502  |
|                           | Wildtype (248)        |                       |                   |         |        |                     |        |
| <b>NRAS<br/>mutations</b> | Mutated (87)          |                       | 0,184             | 0,510   | 0,866  | 0,618               | 1,270  |
|                           | Wildtype (322)        |                       |                   |         |        |                     |        |
| <b>NF1<br/>mutations</b>  | Mutated (40)          |                       | 0,248             | 0,452   | 1,205  | 0,742               | 1,958  |
|                           | Wildtype (369)        |                       |                   |         |        |                     |        |
| <b>ARL11</b>              |                       |                       | 1,035             | 0,936   | 0,920  | 0,121               | 6,995  |
|                           | Low expression (95)   | 2,8                   |                   |         |        |                     |        |
|                           | High expression (314) | 10,7                  |                   |         |        |                     |        |

**Table S8.** Multivariable analysis of *ARL13A* expression for overall survival of TCGA melanoma patients.

|                           | Classification<br>(n) | Mean<br>OS<br>(years) | Standard<br>Error | p-value | Exp(B) | 95,0% CI for Exp(B) |       |
|---------------------------|-----------------------|-----------------------|-------------------|---------|--------|---------------------|-------|
|                           |                       |                       |                   |         |        | Lower               | Upper |
| <b>Age</b>                | Mean=59               |                       | 0,005             | 0,000   | 1,022  | 1,011               | 1,032 |
| <b>Gender</b>             | Male (254)            |                       | 0,159             | 0,619   | 1,082  | 0,792               | 1,478 |
|                           | Female (155)          |                       |                   |         |        |                     |       |
| <b>Tumor<br/>Stage</b>    | Stage I (79)          |                       | 0,359             | 0,000   | 0,250  | 0,124               | 0,506 |
|                           | Stage II (142)        |                       |                   |         |        |                     |       |
|                           | Stage III (165)       |                       |                   |         |        |                     |       |
|                           | Stage IV (23)         |                       |                   |         |        |                     |       |
| <b>Type of<br/>tumor</b>  | Primary (97)          |                       | 0,254             | 0,000   | 2,561  | 1,583               | 4,143 |
|                           | Metastatic (312)      |                       |                   |         |        |                     |       |
| <b>BRAF<br/>mutations</b> | Mutated (161)         |                       | 0,172             | 0,849   | 1,033  | 0,738               | 1,447 |
|                           | Wildtype (248)        |                       |                   |         |        |                     |       |
| <b>NRAS<br/>mutations</b> | Mutated (87)          |                       | 0,185             | 0,427   | 0,864  | 0,601               | 1,241 |
|                           | Wildtype (322)        |                       |                   |         |        |                     |       |
| <b>NF1<br/>mutations</b>  | Mutated (40)          |                       | 0,248             | 0,392   | 1,237  | 0,760               | 2,012 |
|                           | Wildtype (369)        |                       |                   |         |        |                     |       |
| <b>ARL13A</b>             |                       |                       | 0,278             | 0,029   | 0,544  | 0,316               | 0,938 |
|                           | Low expression (384)  | 10,6                  |                   |         |        |                     |       |
|                           | High expression (25)  | 5,5                   |                   |         |        |                     |       |

**Table S9.** Multivariable analysis of *ARL15* expression for overall survival of TCGA melanoma patients.

|                       | Classification (n)    | Mean OS (years) | Standard Error | p-value | Exp(B) | 95,0% CI for Exp(B) |       |
|-----------------------|-----------------------|-----------------|----------------|---------|--------|---------------------|-------|
|                       |                       |                 |                |         |        | Lower               | Upper |
| <b>Age</b>            | Mean=59               |                 | 0,005          | 0,000   | 1,021  | 1,011               | 1,032 |
| <b>Gender</b>         | Male (254)            |                 | 0,159          | 0,440   | 1,131  | 0,828               | 1,544 |
|                       | Female (155)          |                 |                |         |        |                     |       |
| <b>Tumor Stage</b>    | Stage I (79)          |                 | 0,357          | 0,000   | 0,262  | 0,130               | 0,528 |
|                       | Stage II (142)        |                 |                |         |        |                     |       |
|                       | Stage III (165)       |                 |                |         |        |                     |       |
|                       | Stage IV (23)         |                 |                |         |        |                     |       |
| <b>Type of tumor</b>  | Primary (97)          |                 | 0,822          | 0,001   | 2,275  | 1,407               | 3,680 |
|                       | Metastatic (312)      |                 |                |         |        |                     |       |
| <b>BRAF mutations</b> | Mutated (161)         |                 | 0,163          | 0,713   | 1,065  | 0,760               | 1,494 |
|                       | Wildtype (248)        |                 |                |         |        |                     |       |
| <b>NRAS mutations</b> | Mutated (87)          |                 | 0,138          | 0,452   | 0,871  | 0,607               | 1,249 |
|                       | Wildtype (322)        |                 |                |         |        |                     |       |
| <b>NF1 mutations</b>  | Mutated (40)          |                 | 0,224          | 0,368   | 1,251  | 0,768               | 2,037 |
|                       | Wildtype (369)        |                 |                |         |        |                     |       |
| <b>ARL15</b>          |                       |                 | 0,494          | 0,003   | 0,610  | 0,443               | 0,841 |
|                       | Low expression (297)  | 10,3            |                |         |        |                     |       |
|                       | High expression (112) | 6,8             |                |         |        |                     |       |



**Table S10.** Multivariable analysis of *ARL16* expression for overall survival of TCGA melanoma patients.

|                       | Classification (n)    | Mean OS (years) | Standard Error | p-value | Exp(B) | 95,0% CI for Exp(B) |       |
|-----------------------|-----------------------|-----------------|----------------|---------|--------|---------------------|-------|
|                       |                       |                 |                |         |        | Lower               | Upper |
| <b>Age</b>            | Mean=59               |                 | 0,005          | 0,000   | 1,021  | 1,011               | 1,032 |
| <b>Gender</b>         | Male (254)            |                 | 0,159          | 0,525   | 1,106  | 0,810               | 1,510 |
|                       | Female (155)          |                 |                |         |        |                     |       |
| <b>Tumor Stage</b>    | Stage I (79)          |                 | 0,357          | 0,000   | 0,271  | 0,135               | 0,546 |
|                       | Stage II (142)        |                 |                |         |        |                     |       |
|                       | Stage III (165)       |                 |                |         |        |                     |       |
|                       | Stage IV (23)         |                 |                |         |        |                     |       |
| <b>Type of tumor</b>  | Primary (97)          |                 | 0,327          | 0,101   | 1,709  | 0,900               | 3,247 |
|                       | Metastatic (312)      |                 |                |         |        |                     |       |
| <b>BRAF mutations</b> | Mutated (161)         |                 | 0,171          | 0,728   | 1,061  | 0,759               | 1,485 |
|                       | Wildtype (248)        |                 |                |         |        |                     |       |
| <b>NRAS mutations</b> | Mutated (87)          |                 | 0,183          | 0,501   | 0,884  | 0,617               | 1,266 |
|                       | Wildtype (322)        |                 |                |         |        |                     |       |
| <b>NF1 mutations</b>  | Mutated (40)          |                 | 0,249          | 0,361   | 1,256  | 0,771               | 2,047 |
|                       | Wildtype (369)        |                 |                |         |        |                     |       |
| <b>ARL16</b>          |                       |                 | 0,256          | 0,110   | 0,665  | 0,402               | 1,098 |
|                       | Low expression (282)  | 11,2            |                |         |        |                     |       |
|                       | High expression (127) | 4,9             |                |         |        |                     |       |

**Table S11.** Correlation between *ARL* genes expression and the infiltration of distinct immune cell subsets, in SKCM, primary and metastatic melanoma samples. Data obtained from the TIMER2.0 resource, including *p*-values and Spearman's rank correlation coefficients (cor) according to different algorithms applied. Only significant correlations were presented in the table.

| Gene         | Description                | Algorithm     | SKCM   |                        | SKCM - Primary |                        | SKCM - Metastasis |                        |
|--------------|----------------------------|---------------|--------|------------------------|----------------|------------------------|-------------------|------------------------|
|              |                            |               | cor    | <i>p</i> -value        | cor            | <i>p</i> -value        | cor               | <i>p</i> -value        |
| <i>ARL1</i>  | T cells CD4+ memory        | XCELL         | 0.447  | $8.81 \times 10^{-24}$ | 0.725          | $6.76 \times 10^{-18}$ | 0.3               | $8.78 \times 10^{-09}$ |
|              | T cells CD4+ Th1           | XCELL         | -0.577 | $5.60 \times 10^{-42}$ | -0.601         | $2.39 \times 10^{-42}$ | -0.568            | $1.41 \times 10^{-31}$ |
|              | T cells CD4+ Th2           | XCELL         | 0.261  | $1.56 \times 10^{-08}$ | 0.598          | $3.11 \times 10^{-11}$ | 0.098             | $6.68 \times 10^{-02}$ |
|              | Treg                       | QUANTISEQ     | 0.351  | $1.06 \times 10^{-14}$ | 0.458          | $1.31 \times 10^{-06}$ | 0.278             | $1.11 \times 10^{-07}$ |
|              | Neutrophils                | TIMER         | 0.427  | $1.17 \times 10^{-21}$ | 0.501          | $8.17 \times 10^{-08}$ | 0.349             | $1.38 \times 10^{-11}$ |
|              | Common lymphoid progenitor | XCELL         | 0.485  | $2.25 \times 10^{-28}$ | 0.72           | $1.53 \times 10^{-17}$ | 0.411             | $7.87 \times 10^{-16}$ |
| <i>ARL2</i>  | T cells CD4+ Th1           | XCELL         | 0.369  | $3.76 \times 10^{-16}$ | 0.52           | $4.80 \times 10^{-09}$ | 0.312             | $2.04 \times 10^{-09}$ |
| <i>ARL3</i>  | T cells CD8+               | TIMER         | 0.231  | $5.80 \times 10^{-07}$ | 0.47           | $6.02 \times 10^{-07}$ | 0.133             | $1.25 \times 10^{-02}$ |
|              | T cells CD4+ memory        | XCELL         | 0.348  | $2.01 \times 10^{-14}$ | 0.502          | $7.86 \times 10^{-08}$ | 0.263             | $5.35 \times 10^{-07}$ |
|              | T cells CD4+ Th2           | XCELL         | 0.321  | $2.03 \times 10^{-12}$ | 0.47           | $6.29 \times 10^{-07}$ | 0.243             | $3.88 \times 10^{-06}$ |
|              | Common lymphoid progenitor | XCELL         | 0.325  | $1.02 \times 10^{-12}$ | 0.451          | $1.96 \times 10^{-06}$ | 0.287             | $3.89 \times 10^{-08}$ |
| <i>ARL4A</i> | Common lymphoid progenitor | XCELL         | 0.28   | $1.05 \times 10^{-09}$ | 0.433          | $5.37 \times 10^{-06}$ | 0.23              | $1.25 \times 10^{-05}$ |
| <i>ARL4C</i> | T cells CD4+ memory        | XCELL         | 0.444  | $1.51 \times 10^{-23}$ | 0.364          | $1.43 \times 10^{-4}$  | 0.384             | $7.28 \times 10^{-14}$ |
|              | T cells CD4+ Th2           | XCELL         | 0.307  | $2.06 \times 10^{-11}$ | 0.409          | $2.01 \times 10^{-5}$  | 0.22              | $3.10 \times 10^{-05}$ |
|              | Treg                       | QUANTISEQ     | 0.409  | $7.43 \times 10^{-20}$ | 0.363          | $1.79 \times 10^{-04}$ | 0.376             | $2.36 \times 10^{-13}$ |
|              | Neutrophils                | TIMER         | 0.508  | $2.34 \times 10^{-31}$ | 0.362          | $1.87 \times 10^{-04}$ | 0.517             | $1.22 \times 10^{-25}$ |
|              | Macrophages M2             | CIBERSORT-ABS | 0.433  | $2.79 \times 10^{-22}$ | 0.363          | $1.80 \times 10^{-04}$ | 0.407             | $1.56 \times 10^{-15}$ |
|              | Monocyte                   | MCP-COUNTER   | 0.571  | $5.77 \times 10^{-41}$ | 0.321          | $1.01 \times 10^{-03}$ | 0.581             | $2.34 \times 10^{-33}$ |
| <i>ARL5A</i> | T cells CD4+ memory        | EPIC          | 0.46   | $2.70 \times 10^{-25}$ | 0.595          | $4.09 \times 10^{-11}$ | 0.421             | $1.18 \times 10^{-16}$ |
|              | T cells CD4+ memory        | XCELL         | 0.57   | $9.75 \times 10^{-41}$ | 0.603          | $1.95 \times 10^{-11}$ | 0.525             | $1.95 \times 10^{-11}$ |
|              | T cells CD4+ Th2           | XCELL         | 0.388  | $7.87 \times 10^{-18}$ | 0.459          | $1.21 \times 10^{-06}$ | 0.32              | $6.88 \times 10^{-10}$ |
|              | Neutrophils                | TIMER         | 0.556  | $1.88 \times 10^{-38}$ | 0.602          | $2.25 \times 10^{-11}$ | 0.508             | $1.19 \times 10^{-24}$ |

|              |                             |               |        |                        |        |                        |        |                        |
|--------------|-----------------------------|---------------|--------|------------------------|--------|------------------------|--------|------------------------|
|              |                             | MCP-COUNTER   | 0.405  | $1.93 \times 10^{-19}$ | 0.568  | $4.82 \times 10^{-10}$ | 0.377  | $2.25 \times 10^{-13}$ |
|              | Common lymphoid progenitor  | XCELL         | 0.52   | $5.02 \times 10^{-33}$ | 0.657  | $6.23 \times 10^{-14}$ | 0.48   | $9.20 \times 10^{-22}$ |
| <i>ARL5B</i> | T cells CD4+                | EPIC          | 0.413  | $3.29 \times 10^{-20}$ | 0.402  | $2.78 \times 10^{-05}$ | 0.418  | $2.08 \times 10^{-16}$ |
|              | T cells CD4+ memory         | XCELL         | 0.552  | $7.11 \times 10^{-38}$ | 0.679  | $4.43 \times 10^{-15}$ | 0.439  | $4.20 \times 10^{-18}$ |
|              | T cells CD4+ Th2            | XCELL         | 0.417  | $1.12 \times 10^{-20}$ | 0.557  | $1.19 \times 10^{-09}$ | 0.315  | $1.28 \times 10^{-09}$ |
|              | Neutrophils                 | TIMER         | 0.51   | $1.46 \times 10^{-31}$ | 0.537  | $6.01 \times 10^{-09}$ | 0.447  | $8.39 \times 10^{-19}$ |
|              |                             | MCP-COUNTER   | 0.4    | $5.99 \times 10^{-19}$ | 0.395  | $4.04 \times 10^{-05}$ | 0.431  | $1.90 \times 10^{-17}$ |
|              | Common lymphoid progenitor  | XCELL         | 0.495  | $1.16 \times 10^{-29}$ | 0.644  | $2.82 \times 10^{-13}$ | 0.467  | $1.31 \times 10^{-20}$ |
|              | T cell NK                   | XCELL         | -0.417 | $1.17 \times 10^{-20}$ | -0.581 | $1.53 \times 10^{-10}$ | -0.355 | $5.63 \times 10^{-12}$ |
| <i>ARL6</i>  | T cells CD4+ memory         | XCELL         | 0.465  | $6.03 \times 10^{-26}$ | 0.679  | $4.34 \times 10^{-15}$ | 0.308  | $3.05 \times 10^{-09}$ |
|              | T cells CD4+ Th1            | XCELL         | -0.499 | $4.27 \times 10^{-30}$ | -0.532 | $8.65 \times 10^{-09}$ | -0.495 | $2.77 \times 10^{-23}$ |
|              | T cells CD4+ Th2            | XCELL         | 0.266  | $7.76 \times 10^{-09}$ | 0.525  | $1.50 \times 10^{-08}$ | 0.12   | $2.41 \times 10^{-02}$ |
|              | Treg                        | QUANTISEQ     | 0.385  | $1.30 \times 10^{-17}$ | 0.411  | $1.76 \times 10^{-05}$ | 0.323  | $4.85 \times 10^{-10}$ |
|              | Neutrophils                 | TIMER         | 0.481  | $8.67 \times 10^{-28}$ | 0.519  | $2.23 \times 10^{-08}$ | 0.407  | $1.53 \times 10^{-15}$ |
|              |                             | MCP-COUNTER   | 0.422  | $3.66 \times 10^{-21}$ | 0.388  | $5.51 \times 10^{-05}$ | 0.462  | $4.22 \times 10^{-20}$ |
|              | Common lymphoid progenitor  | XCELL         | 0.577  | $6.02 \times 10^{-42}$ | 0.703  | $1.74 \times 10^{-16}$ | 0.543  | $1.67 \times 10^{-28}$ |
|              | T cell NK                   | XCELL         | -0.419 | $6.80 \times 10^{-21}$ | -0.554 | $1.56 \times 10^{-09}$ | -0.365 | $1.32 \times 10^{-12}$ |
| <i>ARL8B</i> | Neutrophils                 | TIMER         | 0.435  | $1.74 \times 10^{-22}$ | 0.548  | $2.44 \times 10^{-09}$ | 0.381  | $1.15 \times 10^{-13}$ |
|              |                             | MCP-COUNTER   | 0.386  | $1.13 \times 10^{-17}$ | 0.48   | $3.23 \times 10^{-07}$ | 0.365  | $1.38 \times 10^{-12}$ |
|              | Common lymphoid progenitor  | XCELL         | 0.413  | $2.70 \times 10^{-20}$ | 0.642  | $3.74 \times 10^{-13}$ | 0.337  | $7.5 \times 10^{-11}$  |
|              | T cell NK                   | XCELL         | -0.228 | $8.43 \times 10^{-07}$ | -0.484 | $2.61 \times 10^{-07}$ | -0.135 | $1.12 \times 10^{-02}$ |
| <i>ARL11</i> | T cells CD8+                | EPIC          | 0.281  | $9.52 \times 10^{-10}$ | 0.469  | $6.68 \times 10^{-07}$ | 0.229  | $1.33 \times 10^{-05}$ |
|              |                             | MCP-COUNTER   | 0.593  | $9.16 \times 10^{-45}$ | 0.373  | $1.14 \times 10^{-04}$ | 0.575  | $1.42 \times 10^{-32}$ |
|              |                             | QUANTISEQ     | 0.571  | $6.75 \times 10^{-41}$ | 0.305  | $1.81 \times 10^{-03}$ | 0.565  | $3.41 \times 10^{-31}$ |
|              |                             | CIBERSORT-ABS | 0.576  | $9.37 \times 10^{-42}$ | 0.348  | $3.44 \times 10^{-04}$ | 0.576  | $1.18 \times 10^{-32}$ |
|              |                             | XCELL         | 0.489  | $7.12 \times 10^{-29}$ | 0.376  | $9.88 \times 10^{-05}$ | 0.477  | $1.81 \times 10^{-21}$ |
|              | T cells CD8+ central memory | XCELL         | 0.572  | $5.16 \times 10^{-41}$ | 0.368  | $1.41 \times 10^{-04}$ | 0.564  | $3.83 \times 10^{-31}$ |
|              | T cells CD4+ memory         | XCELL         | 0.602  | $2.48 \times 10^{-46}$ | 0.485  | $2.47 \times 10^{-07}$ | 0.542  | $1.87 \times 10^{-28}$ |
|              | B cell                      | QUANTISEQ     | 0.404  | $2.41 \times 10^{-19}$ | 0.242  | $1.44 \times 10^{-02}$ | 0.341  | $4.32 \times 10^{-11}$ |
|              |                             | XCELL         | 0.498  | $4.50 \times 10^{-30}$ | 0.32   | $1.05 \times 10^{-03}$ | 0.434  | $1.18 \times 10^{-17}$ |

|               |                                  |               |        |                         |        |                        |       |                        |
|---------------|----------------------------------|---------------|--------|-------------------------|--------|------------------------|-------|------------------------|
|               |                                  | MCP-COUNTER   | 0.443  | $2.46 \times 10^{-23}$  | 0.334  | $6.13 \times 10^{-04}$ | 0.359 | $3.47 \times 10^{-12}$ |
|               | Memory B cell                    | TIMER         | 0.463  | $1.03 \times 10^{-25}$  | 0.435  | $4.79 \times 10^{-06}$ | 0.387 | $4.36 \times 10^{-14}$ |
|               | Neutrophil                       | TIMER         | 0.697  | $8.74 \times 10^{-68}$  | 0.666  | $2.19 \times 10^{-14}$ | 0.667 | $5.93 \times 10^{-47}$ |
|               | Macrophage                       | EPIC          | 0.551  | $1.20 \times 10^{-37}$  | 0.327  | $7.93 \times 10^{-04}$ | 0.568 | $1.33 \times 10^{-31}$ |
|               |                                  | XCELL         | 0.603  | $1.58 \times 10^{-46}$  | 0.412  | $1.65 \times 10^{-05}$ | 0.573 | $2.58 \times 10^{-32}$ |
|               | Macrophage M1                    | CIBERSORT-ABS | 0.612  | $2.28 \times 10^{-48}$  | 0.472  | $5.40 \times 10^{-07}$ | 0.583 | $1.49 \times 10^{-33}$ |
|               |                                  | QUANTISEQ     | 0.462  | $1.64 \times 10^{-25}$  | 0.377  | $9.38 \times 10^{-05}$ | 0.414 | $4.44 \times 10^{-16}$ |
|               |                                  | XCELL         | 0.662  | $6.25 \times 10^{-59}$  | 0.486  | $2.25 \times 10^{-07}$ | 0.64  | $2.89 \times 10^{-42}$ |
|               | Macrophage M2                    | CIBERSORT-ABS | 0.739  | $5.21 \times 10^{-80}$  | 0.692  | $8.48 \times 10^{-16}$ | 0.718 | $2.71 \times 10^{-57}$ |
|               |                                  | QUANTISEQ     | 0.517  | $1.30 \times 10^{-32}$  | 0.225  | $2.27 \times 10^{-02}$ | 0.553 | $9.55 \times 10^{-30}$ |
|               |                                  | TIDE          | -0.604 | $1.01 \times 10^{-46}$  | -0.545 | $3.26 \times 10^{-09}$ | -0.57 | $6.24 \times 10^{-32}$ |
|               | Monocyte                         | MCP-COUNTER   | 0.842  | $4.32 \times 10^{-124}$ | 0.863  | $2.41 \times 10^{-31}$ | 0.809 | $3.06 \times 10^{-83}$ |
|               |                                  | XCELL         | 0.605  | $4.92 \times 10^{-47}$  | 0.37   | $1.29 \times 10^{-04}$ | 0.647 | $2.19 \times 10^{-43}$ |
|               | Myeloid Dendritic Cell           | TIMER         | 0.514  | $3.59 \times 10^{-32}$  | 0.275  | $5.13 \times 10^{-03}$ | 0.547 | $5.82 \times 10^{-29}$ |
|               |                                  | XCELL         | 0.429  | $6.58 \times 10^{-22}$  | 0.305  | $1.84 \times 10^{-03}$ | 0.465 | $2.08 \times 10^{-20}$ |
|               |                                  | MCP-COUNTER   | 0.624  | $1.29 \times 10^{-50}$  | 0.49   | $1.71 \times 10^{-07}$ | 0.614 | $5.24 \times 10^{-38}$ |
|               | Myeloid Dendritic Cell Activated | XCELL         | 0.612  | $2.42 \times 10^{-48}$  | 0.415  | $1.42 \times 10^{-05}$ | 0.585 | $7.72 \times 10^{-34}$ |
|               | Plasmacytoid Dendritic Cell      | XCELL         | 0.496  | $9.91 \times 10^{-30}$  | 0.211  | $3.36 \times 10^{-02}$ | 0.519 | $7.82 \times 10^{-26}$ |
|               | NK cell                          | MCP-COUNTER   | 0.546  | $8.13 \times 10^{-37}$  | 0.433  | $5.62 \times 10^{-06}$ | 0.547 | $5.52 \times 10^{-29}$ |
|               | NK cell Activated                | MCP-COUNTER   | 0.467  | $4.14 \times 10^{-26}$  | 0.454  | $1.68 \times 10^{-06}$ | 0.445 | $1.26 \times 10^{-18}$ |
|               | T cell follicular helper         | CIBERSORT-ABS | 0.508  | $2.23 \times 10^{-31}$  | 0.42   | $1.14 \times 10^{-05}$ | 0.515 | $2.17 \times 10^{-25}$ |
| <i>ARL13B</i> | T cells CD4+ memory              | XCELL         | 0.522  | $2.68 \times 10^{-33}$  | 0.662  | $3.37 \times 10^{-14}$ | 0.428 | $3.27 \times 10^{-17}$ |
|               | T cells CD4+ Th2                 | XCELL         | 0.36   | $1.92 \times 10^{-15}$  | 0.534  | $7.35 \times 10^{-09}$ | 0.259 | $7.97 \times 10^{-07}$ |
|               | Treg                             | QUANTISEQ     | 0.463  | $1.24 \times 10^{-25}$  | 0.45   | $2.05 \times 10^{-06}$ | 0.431 | $2.04 \times 10^{-17}$ |
|               | Neutrophil                       | MCP-COUNTER   | 0.449  | $4.60 \times 10^{-24}$  | 0.452  | $1.89 \times 10^{-06}$ | 0.478 | $1.21 \times 10^{-21}$ |
|               |                                  | TIMER         | 0.545  | $9.86 \times 10^{-37}$  | 0.5    | $8.62 \times 10^{-08}$ | 0.518 | $9.65 \times 10^{-26}$ |
|               | Common lymphoid progenitor       | XCELL         | 0.54   | $5.49 \times 10^{-36}$  | 0.77   | $3.23 \times 10^{-21}$ | 0.471 | $6.04 \times 10^{-21}$ |

|              |                                       |                   |        |                        |        |                        |        |                        |
|--------------|---------------------------------------|-------------------|--------|------------------------|--------|------------------------|--------|------------------------|
|              | <b>T cell NK</b>                      | XCELL             | -0.428 | $8.81 \times 10^{-22}$ | -0.601 | $2.44 \times 10^{-11}$ | -0.361 | $2.29 \times 10^{-12}$ |
| <i>ARL15</i> | <b>T cell CD4+</b>                    | EPIC              | 0.431  | $4.43 \times 10^{-22}$ | 0.542  | $4.06 \times 10^{-09}$ | 0.393  | $1.72 \times 10^{-14}$ |
|              | <b>T cell CD4+<br/>memory</b>         | XCELL             | 0.419  | $7.47 \times 10^{-21}$ | 0.353  | $2.71 \times 10^{-04}$ | 0.36   | $3.01 \times 10^{-12}$ |
|              | <b>T cells CD4+<br/>Th1</b>           | XCELL             | -0.506 | $4.26 \times 10^{-31}$ | -0.541 | $4.20 \times 10^{-09}$ | -0.5   | $8.59 \times 10^{-24}$ |
|              | <b>Tregs</b>                          | QUANTISEQ         | 0.392  | $3.29 \times 10^{-18}$ | 0.446  | $2.70 \times 10^{-06}$ | 0.342  | $3.70 \times 10^{-11}$ |
|              | <b>Neutrophil</b>                     | TIMER             | 0.559  | $6.21 \times 10^{-39}$ | 0.6    | $2.62 \times 10^{-11}$ | 0.511  | $5.58 \times 10^{-25}$ |
|              | <b>Macrophage<br/>M2</b>              | CIBERSORT-<br>ABS | 0.504  | $7.57 \times 10^{-31}$ | 0.409  | $1.99 \times 10^{-05}$ | 0.515  | $2.37 \times 10^{-25}$ |
|              | <b>Monocytes</b>                      | QUANTISEQ         | 0.344  | $4.11 \times 10^{-14}$ | 0.477  | $4.02 \times 10^{-07}$ | 0.339  | $5.44 \times 10^{-11}$ |
|              | <b>Myeloid<br/>Dendritic<br/>cell</b> | MCP-<br>COUNTER   | 0.444  | $1.68 \times 10^{-23}$ | 0.428  | $7.14 \times 10^{-06}$ | 0.403  | $2.94 \times 10^{-15}$ |
|              | <b>NK cell</b>                        | QUANTISEQ         | 0.405  | $1.98 \times 10^{-19}$ | 0.448  | $2.37 \times 10^{-06}$ | 0.424  | $7.05 \times 10^{-17}$ |
|              | <b>T cell NK</b>                      | XCELL             | -0.383 | $1.96 \times 10^{-17}$ | -0.541 | $4.43 \times 10^{-09}$ | -0.31  | $2.57 \times 10^{-09}$ |

**Table S12.** Expression thresholds defined to divide patients into two non-overlapping groups with high or low *ARL* expression

| Variables     | Threshold |
|---------------|-----------|
| <i>ARL1</i>   | 10,72     |
| <i>ARL2</i>   | 11.09     |
| <i>ARL3</i>   | 9.50      |
| <i>ARL4A</i>  | 11.125    |
| <i>ARL4C</i>  | 10.43     |
| <i>ARL4D</i>  | 10.25     |
| <i>ARL5A</i>  | 11.04     |
| <i>ARL5B</i>  | 10.03     |
| <i>ARL5C</i>  | 1.13      |
| <i>ARL6</i>   | 7.44      |
| <i>ARL8A</i>  | 10.62     |
| <i>ARL8B</i>  | 12.26     |
| <i>ARL9</i>   | 4.80      |
| <i>ARL10</i>  | 9.57      |
| <i>ARL11</i>  | 4.27      |
| <i>ARL13A</i> | 1.70      |
| <i>ARL13B</i> | 8.01      |
| <i>ARL14</i>  | 1.29      |
| <i>ARL15</i>  | 9.54      |
| <i>ARL16</i>  | 9.88      |
| <i>ARL17A</i> | 9.99      |
| <i>ARL17B</i> | 6.75      |
